# Supplementary material for: Uptake of Plasmodium chabaudi hemozoin drives Kupffer cell death and fuels superinfections
Source: PubMed Central journal article supplement (PMC9671901; doi:10.1038/s41598-022-23858-7), 2022-11-17
Supplement: 41598_2022_23858_MOESM4_ESM.pdf [file 41598_2022_23858_MOESM4_ESM.pdf]

## **Uptake of *Plasmodium* hemozoin drives Kupffer cell death and fuels superinfections**

Isabella C. Hirako<sup>1,2</sup>, Maísa Mota Antunes<sup>4</sup>, Rafael Machado Rezende<sup>3</sup>, Natália Satchiko Hojo-Souza<sup>1</sup>, Maria Marta Figueiredo<sup>6</sup>, Thomaz Dias<sup>7</sup>, Helder Nakaya<sup>7</sup>, Gustavo Batista Menezes<sup>4\*</sup> and Ricardo Tostes Gazzinelli<sup>1,2,5,8\*</sup>

Instituto René Rachou, Fundação Oswaldo Cruz, Belo Horizonte, MG, Brazil<sup>1</sup>; Division of Infectious Diseases and Immunology, University of Massachusetts Medical School, Worcester, MA, USA<sup>2</sup>; Ann Romney Center for Neurologic Diseases, Brigham and Women's Hospital, Harvard Medical School, Boston, MA, USA<sup>3</sup>; Center for Gastrointestinal Biology, Departamento de Morfologia, Instituto de Ciências Biológicas, Universidade Federal de Minas Gerais, Belo Horizonte, MG, Brazil<sup>4</sup>; Departamento de Bioquímica e Imunologia, Instituto de Ciências Biológicas, Universidade Federal de Minas Gerais, Belo Horizonte, MG, Brazil<sup>5</sup>; Universidade Estadual de Minas Gerais, Divinópolis, MG, Brazil<sup>6</sup>; Escola de Ciências Farmacêuticas – Universidade de São Paulo, São Paulo, SP, Brazil<sup>7</sup>; Plataforma de Medicina Translacional, Fundação Oswaldo Cruz / Faculdade de Medicina de Ribeirão Preto, Ribeirão Preto, SP, Brazil<sup>8</sup>.

\*These authors jointly supervised this work.

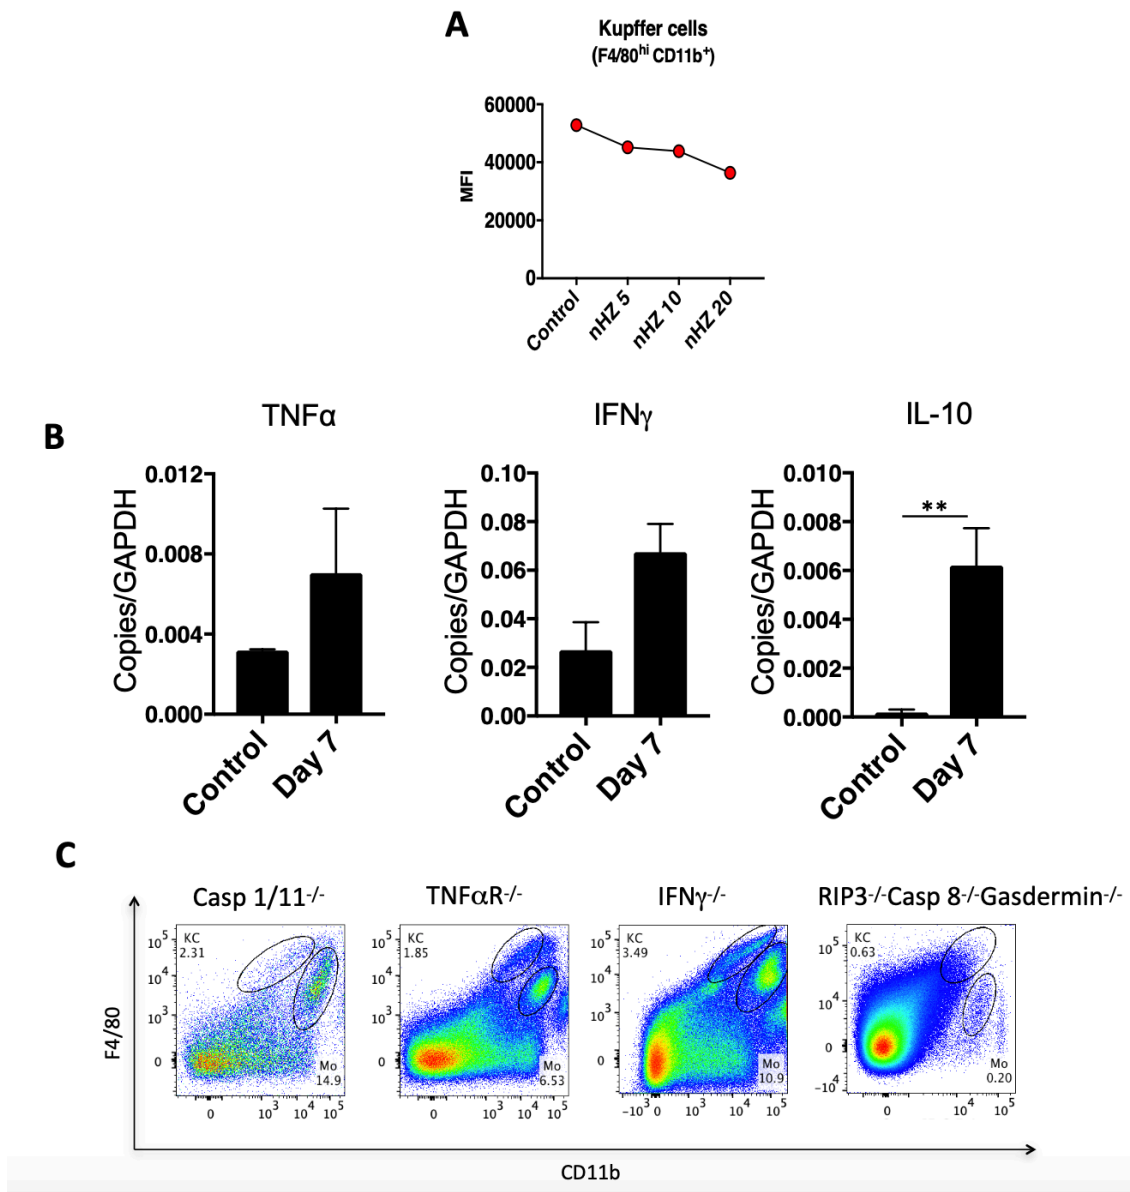

**Supplementary Fig. 1: Kupffer cell death and cytokine deficient mice.** (A) Line graphs correspond to MFI of F4/80<sup>high</sup> Kupffer cells after overnight culture with natural hemozoin crystals. (B) TNF- $\alpha$ , IFN- $\gamma$  and IL-10 mRNA expression in isolated liver nonparenchymal cells. (C) Percentage of Kupffer cells from Caspase 1/11<sup>-/-</sup>, TNF $\alpha$ R<sup>-/-</sup>, IFN $\gamma$ <sup>-/-</sup> and RIP3<sup>-/-</sup> Casp 8<sup>-/-</sup> Gasdermin<sup>-/-</sup> mice 7 days post *P. chabaudi* infection. Data are represented as mean  $\pm$  SD. Statistical significance comparing infected and non-infected mice. (Student's t test, \*\* $p < 0.01$ ).

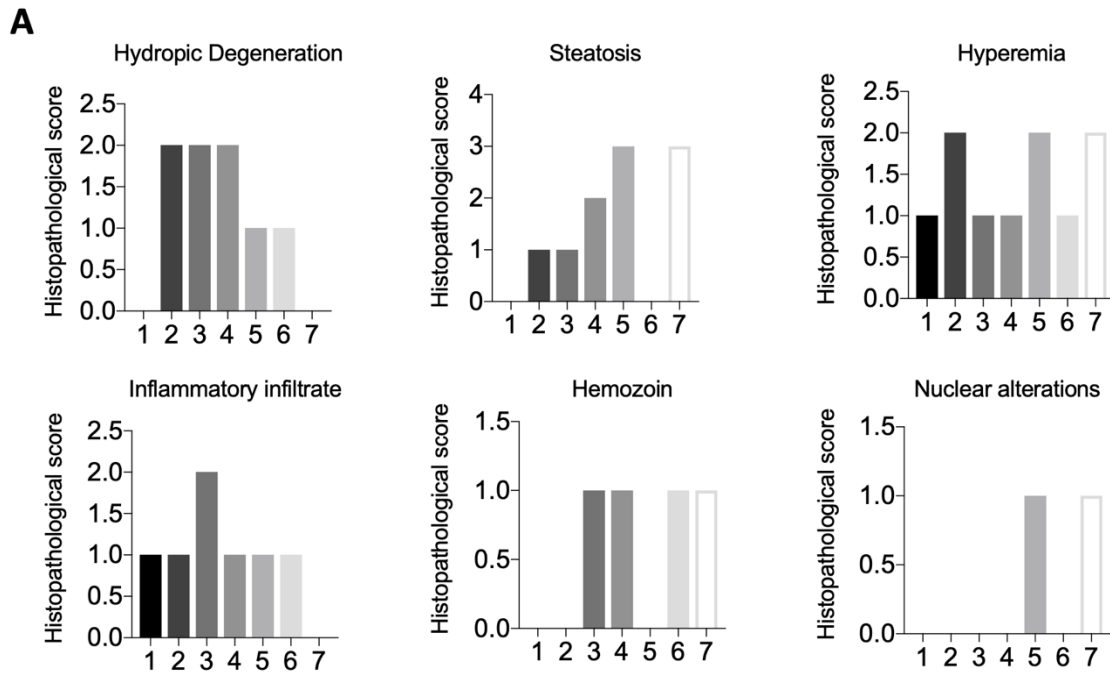

**Supplementary Fig. 2: Histopathological scores.** (A1) Hydropic degeneration, (A2) Steatosis, (A3) Hyperemia, (A4) Inflammatory infiltrate, (A5) Hemozoin and (A6) Nuclear alterations. Samples: 1) C57BL/6 non-infected. 2)  $10^3$  MHV-3. 3) *P. chabaudi* (day 9). 4) *P. chabaudi* (day 9) +  $10^3$  MHV-3. 5)  $10^3$  MHV-3. 6) *P. chabaudi* (day 32). 7) *P. chabaudi* (day 32) +  $10^3$  MHV-3.

**Supplementary Video 1: Kupffer cells localization in sinusoids and cytoplasmic arm-like protrusions.** Three-dimensional reconstruction for an intravital microscopy Z-stack showing Kupffer cells (anti-F4/80; green) localization in sinusoids (anti-CD31; blue) and cytoplasmic arm-like protrusions that can increase their area, allowing a better sampling of molecules and antigens in the circulation. 20x Objective.

**Supplementary Video 2: Changes on morphology of Kupffer cells over *P. chabaudi* infection.** Three-dimensional reconstruction for an intravital

microscopy Z-stack showing transition of morphology of an Kupffer "star-like" shape cell (anti-F4/80; green) to a round-shape morphology, lacking the classic protrusions. 20x Objective.

**Supplementary Video 3: Catching of *E. coli* by Kupffer cells of uninfected and infected mice.** Real-time movie showing *E. coli* (e-GFP; green) free flowing within sinusoids in co-infected group, while they were almost instantaneously arrested by Kupffer cells (anti-F4/80; purple) in mice which are not challenged with *Plasmodium*. 20x Objective.
